# Supplementary material
Source: publisher figshare collection journal article supplement (https://asha.figshare.com/ndownloader/files/25915419)
Supplement: Supplementary file 1 [file 25915419]

## **Supplemental Material S1.** Sampling of resources on autistic first-person perspectives.

### Websites:

Actually Autistic Blog Search Engine

<http://soulriser.net/search/actually-autistic/>

- This search engine allows you to search blogs written by autistic individuals by topic of interest.

Autistic Self Advocacy Network (ASAN)

<https://autisticadvocacy.org/about-asan/about-autism/>

- Founded in 2006, the Autistic Self Advocacy Network is a 501(c)(3) nonprofit organization run by and for autistic people. They offer a variety of position statements and other resources to help ensure that the voice of autistic individuals is represented in public policy and society at large.

### Videos

Neurowonder by Amythest Schaber

<https://www.youtube.com/channel/UC9Bk0GbW8xgvTgQlheNG5uw>

- The YouTube channel includes a series of educational "Ask an Autistic" videos on important topics such as stimming, echolalia, scripting, prosopagnosia, autistic burn out, etc.

Sarai Pahla, *Women & Autism. Toward a Better Understanding.*

<https://www.youtube.com/watch?v=MA7o6FgPRU>

- This TED talk by a young woman who grew up in South Africa humorously highlights gendered expectations placed on women and how those expectations intersect with her autistic experience, with a particular focus on dating and relationships.

Rosie King, *How Autism Freed me to be Myself*

[https://www.ted.com/talks/rosie\\_king\\_how\\_autism\\_freed\\_me\\_to\\_be\\_myself?language=en](https://www.ted.com/talks/rosie_king_how_autism_freed_me_to_be_myself?language=en)

- This TED talk by a young British writer and autism advocate humorously addresses common stereotypes associated with autism and challenges the concept of "normal."

### Books

Dalmayne, E. (2016). *Susie Spins*. Stass Publications, UK.

- A picture book written to help young children understand the everyday experiences of an autistic child.

Stefanski, D. (2011) *Ask an Autistic Kid*. Minneapolis, MN: Free Spirit Publishing.

- This short picture book written by a teenage boy speaks directly to questions peers might have about autism.

Tammet, Daniel *Born on a Blue Day*.

- This nonfiction book, written by British man with unique abilities related to numbers and languages, provides a valuable perspective on how his particular brain works.

Higashida, N. (2013). *The reason I jump*. New York: Random House.

- The book was authored by a nonspeaking autistic teenage from Japan. It explains different aspects of his autistic experience.

Sutton, M. (2015). *The real experts: Readings for parents of autistic children*. Automonmous Press: Fort Worth, TX.

- This series of essays written by prominent autistic authors is focused on translating autistic experience explicitly for nonautistic parents.
